# Supplementary material for: Improving the electrocatalytic activity of Pd nanoparticles through electronic coupling interaction with a Ni2P–MoS2 hybrid support for ethanol electro-oxidation in an alkaline medium
Source: Royal Society of Chemistry journal article supplement (doi:10.1039/d4se01223b), 2025-01-01
Supplement: d4se01223b1.pdf [file d4se01223b1.pdf]

# Supplementary Information

## Improving the electrocatalytic activity of Pd nanoparticles through electronic coupling interaction with a Ni<sub>2</sub>P–MoS<sub>2</sub> hybrid support for ethanol electrooxidation in an alkaline medium

Thabo Matthews<sup>a,b,c,\*</sup>, Makhaokane Paulina Chabalala<sup>b,c</sup>, Siyabonga Patrick Mbokazi<sup>b,c</sup>, Memory Zikhali<sup>b,c</sup>, Tarekegn Heliso Dolla<sup>d</sup>, Anatolijs Šarakovskis<sup>e</sup>, Guntars Vaivars<sup>e,f,g</sup>, Tunde Lewis Yusuf<sup>h</sup>, Rhiyaad Mohamed<sup>a</sup>, Nobanathi Wendy Maxakato<sup>b,c,\*</sup>

<sup>a</sup>HySA/Catalysis Centre of Competence, Catalysis Institute, Department of Chemical Engineering, University of Cape Town, Cape Town 7701, South Africa

<sup>b</sup>Department of Chemical Sciences, University of Johannesburg, Doornfontein, 2028, South Africa

<sup>c</sup>Center for Nanomaterials Research, University of Johannesburg, South Africa

<sup>d</sup>Institute for Catalysis and Energy Solutions (ICES), College of Science, Engineering and Technology, University of South Africa (UNISA), Private Bag X6, Florida, 1710, South Africa

<sup>e</sup>Institute of Solid State Physics, University of Latvia, Kengaraga Iela 8, LV-1063 Riga, Latvia

<sup>f</sup>Faculty of Chemistry, University of Latvia, Jelgavas Iela 1, LV-1004 Riga, Latvia

<sup>g</sup>Institute of Chemical Physics, University of Latvia, Jelgavas Iela 1, LV-1004 Riga, Latvia

<sup>h</sup>Department of Chemistry, Faculty of Natural and Agricultural Sciences, University of Pretoria, Private Bag X20, Hatfield 0028, Pretoria, South Africa

\*Corresponding author E-mail address: [nmaxakato@uj.ac.za](mailto:nmaxakato@uj.ac.za), [matthewsThabo@gmail.com](mailto:matthewsThabo@gmail.com) and [matthews.thabo@uct.ac.za](mailto:matthews.thabo@uct.ac.za)



**Table S1.** Current loss in percentage obtained from durability test employing chronoamperometry and cyclic voltammetry after 10000 s and 500 cycles, respectively.

| Electrocatalyst                       | *Rate of current loss $\sigma$ ( $\%s^{-1}$ ) | Current loss (%) |    | Remarks                                                                                                                                                                                                                                                                                                   |
|---------------------------------------|-----------------------------------------------|------------------|----|-----------------------------------------------------------------------------------------------------------------------------------------------------------------------------------------------------------------------------------------------------------------------------------------------------------|
|                                       |                                               | CA               | CV |                                                                                                                                                                                                                                                                                                           |
| Pd/Ni <sub>2</sub> P-MoS <sub>2</sub> | 1.63 x 10 <sup>-3</sup>                       | 66.81            | 11 | <ul style="list-style-type: none"> <li>• MoS<sub>2</sub>-(Pd)-Ni<sub>2</sub>P Synergy enhances the stability and dispersion of Pd nanoparticles and a high density of active sites.</li> <li>• Strong support for metal interaction and combination of electronic, geometric, and synergistic.</li> </ul> |
| Pd/Ni <sub>2</sub> P                  | 3.06 x 10 <sup>-3</sup>                       | 76.03            | 15 | <ul style="list-style-type: none"> <li>• Electronic Interactions lead to alterations in the electronic structure of both materials.</li> </ul>                                                                                                                                                            |
| Pd/C                                  | 3.94 x 10 <sup>-3</sup>                       | 82.70            | 21 | <ul style="list-style-type: none"> <li>• Compromised Pd NPs on carbon (agglomeration, coalition)</li> </ul>                                                                                                                                                                                               |
| Pd/MoS <sub>2</sub>                   | 0.014                                         | 91.53            | 42 | <ul style="list-style-type: none"> <li>• Pd phase transitions leading to loss of active surface area hence reduced active site</li> </ul>                                                                                                                                                                 |

\*  $\sigma(\%s^{-1}) = \frac{100}{I_0} \left( \frac{dI}{dt} \right)_{t > 2500s}$ , long term poisoning rate. We propose that the calculation of  $\sigma(\%s^{-1})$  for chronoamperometry is a better way of data evaluation as this equation can be used in the predetermination of stability. The reason is that the calculation involves the rate of change in the current decay trajectory with time. Hence, it is more suited and can be used in place of the  $I_f/I_b$  ratio.

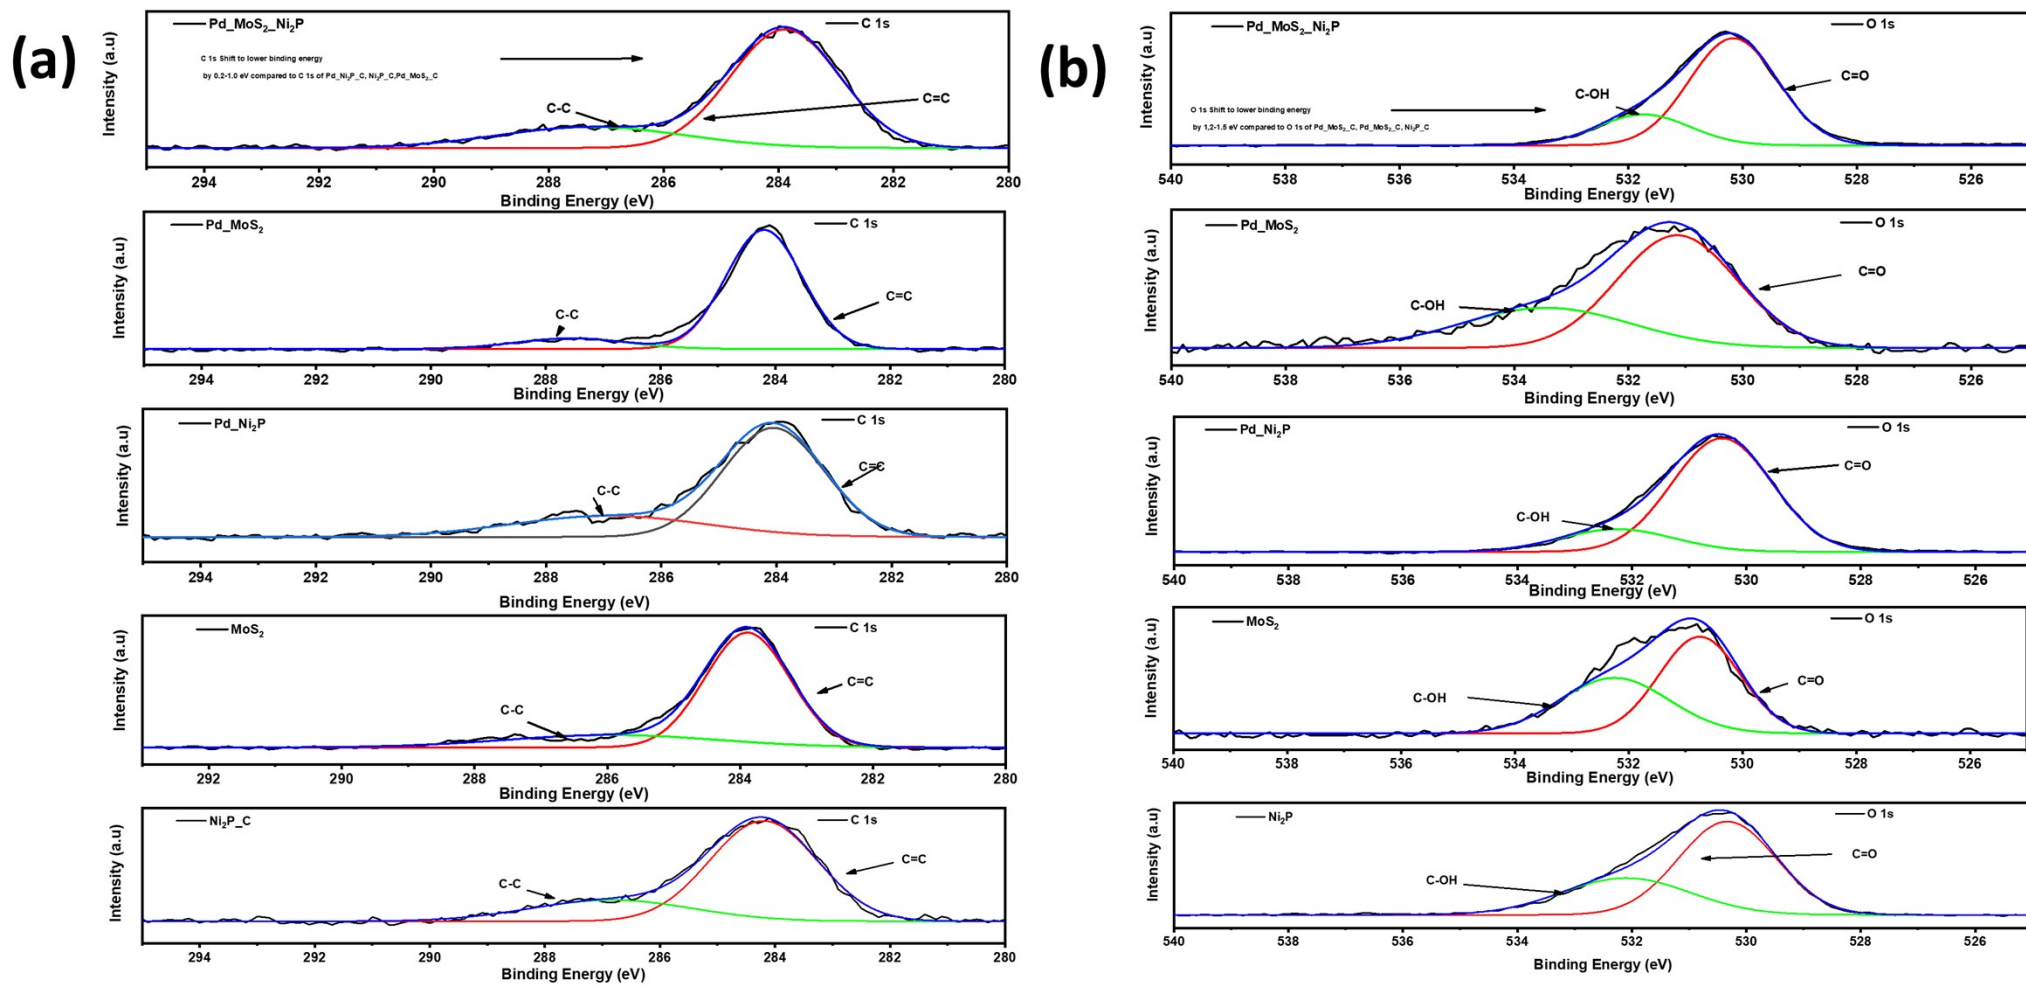

**Figure S1:** XPS spectra for C 1s and O 1s.

**Table S2:** Comparison of the mass activity of the prepared electrocatalysts with those reported in the literature for ethanol electrooxidation.

| Electrocatalyst                           | Electrolyte                | Current density<br>( $i_f$ )          | Scan rate<br>( $\text{mV}\cdot\text{s}^{-1}$ ) | Reference |
|-------------------------------------------|----------------------------|---------------------------------------|------------------------------------------------|-----------|
| <b>Pd/Ni<sub>2</sub>P-MoS<sub>2</sub></b> | 0.5 M Ethanol + 1 M KOH    | 1579 mA $\text{mg}^{-1}_{\text{Pd}}$  | 50                                             | This work |
| <b>Pd/Ni<sub>2</sub>P</b>                 | 0.5 M Ethanol + 1 M KOH    | 314.8 mA $\text{mg}^{-1}_{\text{Pd}}$ | 50                                             | This work |
| <b>Pd/MoS<sub>2</sub></b>                 | 0.5 M Ethanol + 1 M KOH    | 69.2 mA $\text{mg}^{-1}_{\text{Pd}}$  | 50                                             | This work |
| Pd-NiO (6:1 by weight)/C                  | 1 M Ethanol + 1 M KOH      | 95 mA $\text{cm}^{-2}$                | 50                                             | [1]       |
| Pd <sub>2</sub> Ru/C                      | 1.0 M NaOH + 1.0 M ethanol | 23 mA $\text{cm}^{-2}$                | 50                                             | [2]       |
| 10%Pd-10%Ag/C                             | 1 M Ethanol + 1 M KOH      | ~3.7 mA $\text{cm}^{-2}$              | 50                                             | [3]       |
| Pd/C                                      | Ethanol + 1 M NaOH         | ~16 mA $\text{cm}^{-2}$               | 50                                             | [4]       |

## References

- [1] C. Xu, P. kang Shen, Y. Liu, J Power Sources 164 (2007) 527–531.
- [2] J. Guo, R. Chen, F.-C. Zhu, S.-G. Sun, H.M. Villullas, Appl Catal B 224 (2018) 602–611.
- [3] S.T. Nguyen, H.M. Law, H.T. Nguyen, N. Kristian, S. Wang, S.H. Chan, X. Wang, Appl Catal B 91 (2009) 507–515.
- [4] G. Cui, S. Song, P.K. Shen, A. Kowal, C. Bianchini, The Journal of Physical Chemistry C 113 (2009) 15639–15642.
